# Supplementary material for: Enhanced Oral Bioavailability of Celecoxib Nanocrystalline Solid Dispersion based on Wet Media Milling Technique: Formulation, Optimization and In Vitro/In Vivo Evaluation
Source: Pharmaceutics. 2019 Jul 11;11(7):328. doi: 10.3390/pharmaceutics11070328 (PMC6680726; doi:10.3390/pharmaceutics11070328)
Supplement: Supplementary file 1 [file pharmaceutics-11-00328-s001.pdf]

# Supplementary Materials: Enhanced Oral Bioavailability of Celecoxib Nanocrystalline Solid Dispersion based on Wet Media Milling Technique: Formulation, Optimization and In Vitro/In Vivo Evaluation

Zhuang Ding <sup>†</sup>, Lili Wang <sup>†</sup>, Yangyang Xing, Yanna Zhao, Zhengping Wang and Jun Han <sup>\*</sup>

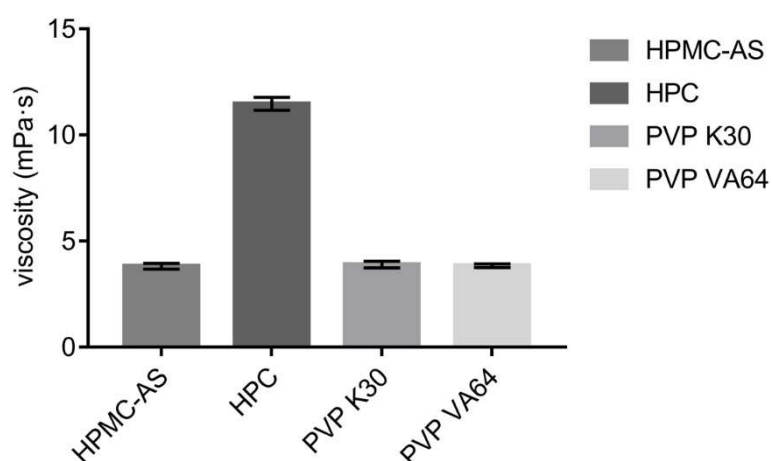

**Figure 1.** Viscosity values of the suspension containing different polymer stabilizer.

## Experimental Method:

### *Viscosity Measurement*

CLX (4% *w/v*), primary stabilizer (0.8% *w/v*) and secondary stabilizer (0.1% *w/v*) were dispersed in an aqueous solution (400 mL) using a magnetic stirrer operating at 500 rpm. PVP VA64, PVP K30, HPMC-AS and HPC were used singly as the primary stabilizer, while SDS was used as the secondary stabilizer. The viscosity of these suspensions were measured using a rotational Viscometer (DV-I + Digital, Brookfield, WI, USA) at 25 °C and 100 rpm speed by No. 1 rotor. Each sample was performed in triplicate.

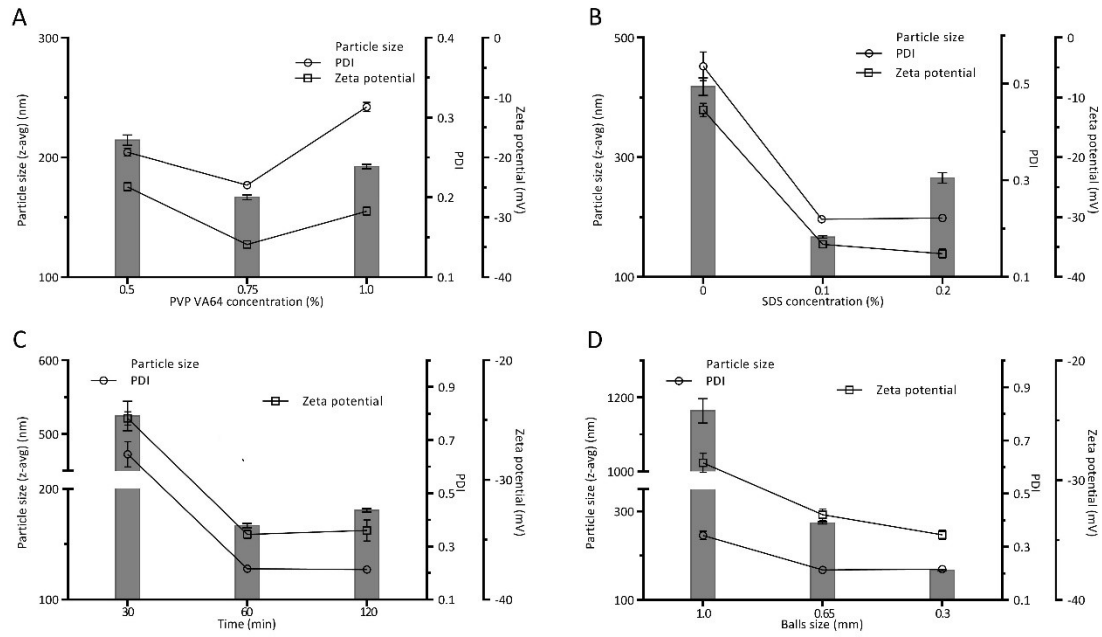

**Figure 2.** Effects of critical material attributes (CMAs) and critical process parameters (CPPs) on critical quality attributes (CQAs) of CLX-NC. CMAs and CPPs include (A) PVP VA64 concentration, (B) SDS concentration, (C) milling times, and (D) balls size.

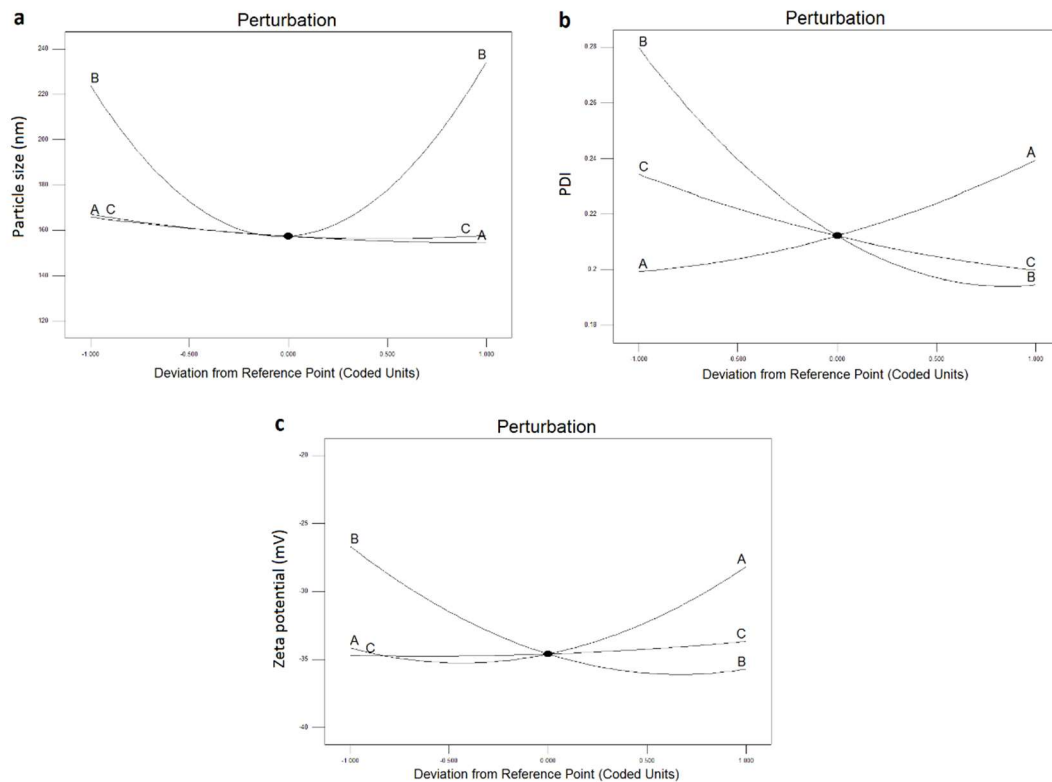

**Figure 3.** Perturbation plots showed the effects of factors  $X_1$  (A),  $X_2$  (B) and  $X_3$  (C) on the responses  $Y_1$  (a),  $Y_2$  (b) and  $Y_3$  (c).  $X_1$  is the factor of concentration of polymer stabilizer (% w/v),  $X_2$  is the factor of concentration of secondary stabilizer (% w/v),  $X_3$  is the factor of milling time (min),  $Y_1$  is the response of particle size (nm),  $Y_2$  is the response of PDI,  $Y_3$  is the response of zeta potential (mV).



**Table 1.** Preliminary risk assessment matrix elucidating the impact of critical material attributes (CMAs) and critical process parameters (CPPs) on critical quality attributes (CQAs).

| CQAs           | Risk Assessment Matrix  |                                      |                                    |                               |                    |                 |                               |
|----------------|-------------------------|--------------------------------------|------------------------------------|-------------------------------|--------------------|-----------------|-------------------------------|
|                | CMAs                    |                                      |                                    |                               | CPPs               |                 |                               |
|                | Primary stabilizer type | Primary stabilizer concentration (%) | Ionic surfactant concentration (%) | Drug amount <sup>a</sup> (mg) | Milling time (min) | Balls size (mm) | Mill speed <sup>a</sup> (rpm) |
| Particle size  | High                    | High                                 | High                               | Medium                        | High               | High            | High                          |
| PDI            | High                    | High                                 | High                               | Medium                        | High               | Medium          | Medium                        |
| Zeta potential | High                    | Medium                               | High                               | Medium                        | Medium             | Medium          | Medium                        |

<sup>a</sup> Preliminary risk assessment was deduced based on the previous literatures [1,2].

**Table 2.** Fit summary for responses Y<sub>1</sub>, Y<sub>2</sub> and Y<sub>3</sub>.

|                                 | Sum of squares |            |          | df                 |        |        | F-value             |        |         | p value (Prob>F) |            |          |           |            |      |
|---------------------------------|----------------|------------|----------|--------------------|--------|--------|---------------------|--------|---------|------------------|------------|----------|-----------|------------|------|
|                                 | Y1             | Y2         | Y3       | Y1                 | Y2     | Y3     | Y1                  | Y2     | Y3      | Y1               | Y2         | Y3       |           |            |      |
| Sequential model sum of squares |                |            |          |                    |        |        |                     |        |         |                  |            |          |           |            |      |
| Linear                          | 1095.85        | 0.034      | 404.44   | 3                  | 3      | 3      | 0.077               | 12.37  | 5.66    | 0.9717           | 0.0002     | 0.0077   |           |            |      |
| 2FI                             | 1640.39        | 4.801E-003 | 72.00    | 3                  | 3      | 3      | 0.095               | 2.07   | 1.01    | 0.9614           | 0.1532     | 0.4195   |           |            |      |
| Quadratic                       | 74434.69       | 9.425E-003 | 305.89   | 3                  | 3      | 3      | 981.53              | 51.84  | 351.95  | < 0.0001         | < 0.0001   | < 0.0001 |           |            |      |
| Cubic                           | 118.67         | 3.086E-004 | 0.033    | 4                  | 4      | 4      | 1.33                | 1.56   | 0.017   | 0.3597           | 0.2988     | 0.9992   |           |            |      |
| Residual                        | 134.11         | 2.974E-004 | 2.86     | 6                  | 6      | 6      |                     |        |         |                  |            |          |           |            |      |
| Total                           | 9.738E+005     | 1.18       | 18367.68 | 20                 | 20     | 20     |                     |        |         |                  |            |          |           |            |      |
|                                 | R-squared      |            |          | Adjusted R-squared |        |        | Predicted R-squared |        |         | PRESS            |            |          | Std. Dev. |            |      |
|                                 | Y1             | Y2         | Y3       | Y1                 | Y2     | Y3     | Y1                  | Y2     | Y3      | Y1               | Y2         | Y3       | Y1        | Y2         | Y3   |
| Model summary statistics        |                |            |          |                    |        |        |                     |        |         |                  |            |          |           |            |      |
| Linear                          | 0.0142         | 0.6987     | 0.5151   | -0.1707            | 0.6422 | 0.4241 | -0.6322             | 0.5026 | 0.2416  | 1.264E+005       | 0.024      | 595.53   | 69.07     | 0.030      | 4.88 |
| 2FI                             | 0.0353         | 0.7963     | 0.6068   | -0.4099            | 0.7022 | 0.4253 | -1.0642             | 0.4699 | -0.0151 | 1.598E+005       | 0.026      | 797.06   | 75.80     | 0.028      | 4.87 |
| Quadratic                       | 0.9967         | 0.9877     | 0.9963   | 0.9938             | 0.9766 | 0.9930 | 0.9786              | 0.9284 | 0.9763  | 1653.26          | 3.525E-003 | 18.61    | 5.03      | 7.785E-003 | 0.54 |
| Cubic                           | 0.9983         | 0.9940     | 0.9964   | 0.9945             | 0.9809 | 0.9884 | 0.7388              | 0.4483 | 0.3446  | 20226.32         | 0.027      | 514.61   | 4.73      | 7.041E-003 | 0.69 |

## References

1. Leena Peltonen, L. Design space and QbD approach for production of drug nanocrystals by wet media milling techniques. *Pharmaceutics* **2018**, *10*, 104.
2. Narayan, R.; Pednekar, A.; Bhuyan, D.; Gowda, C.; Koteswara, K.B.; Nayak, U.Y. A top-down technique to improve the solubility and bioavailability of aceclofenac: In vitro and in vivo studies. *Int. J. Nanomed.* **2017**, *12*, 4921–4935.
